# Supplementary material
Source: publisher figshare collection journal article supplement (https://gsapubs.figshare.com/ndownloader/files/24491042)
Supplement: Supplementary file 1 [file 24491042]

Supplementary data for

Late Quaternary Slip Rate of the Aksay Segment and its fast  
decreasing gradient along the Altyn Tagh Fault

Jinrui Liu<sup>1,2</sup>, Zhikun Ren<sup>1,2\*</sup>, Wenjun Zheng<sup>3,4</sup>, Wei Min<sup>2</sup>, Zhigang Li<sup>3,4</sup>, Gang Zheng<sup>5</sup>

*<sup>1</sup>State Key Laboratory of Earthquake Dynamics, Institute of Geology, China  
Earthquake Administration, Beijing, China*

*<sup>2</sup>Key Laboratory of Active Tectonics and Volcano, Institute of Geology, China  
Earthquake Administration, Beijing, China*

*<sup>3</sup>Guangdong Provincial Key Lab of Geodynamics and Geohazards, School of Earth  
Sciences and Engineering, Sun Yat-sen University, Guangzhou, China*

*<sup>4</sup>Southern Marine Science and Engineering Guangdong Laboratory (Zhuhai), Zhuhai,  
China*

*<sup>5</sup>GNSS Research Center, Wuhan University, Wuhan, China*

**Contents of this file**

Figures S1 to S5

**Introduction**

This supporting information provides the processes of displacements measurement at the Jiaerwuzongcun site and the Yandantu site with the LaDiCaoz\_v2 code

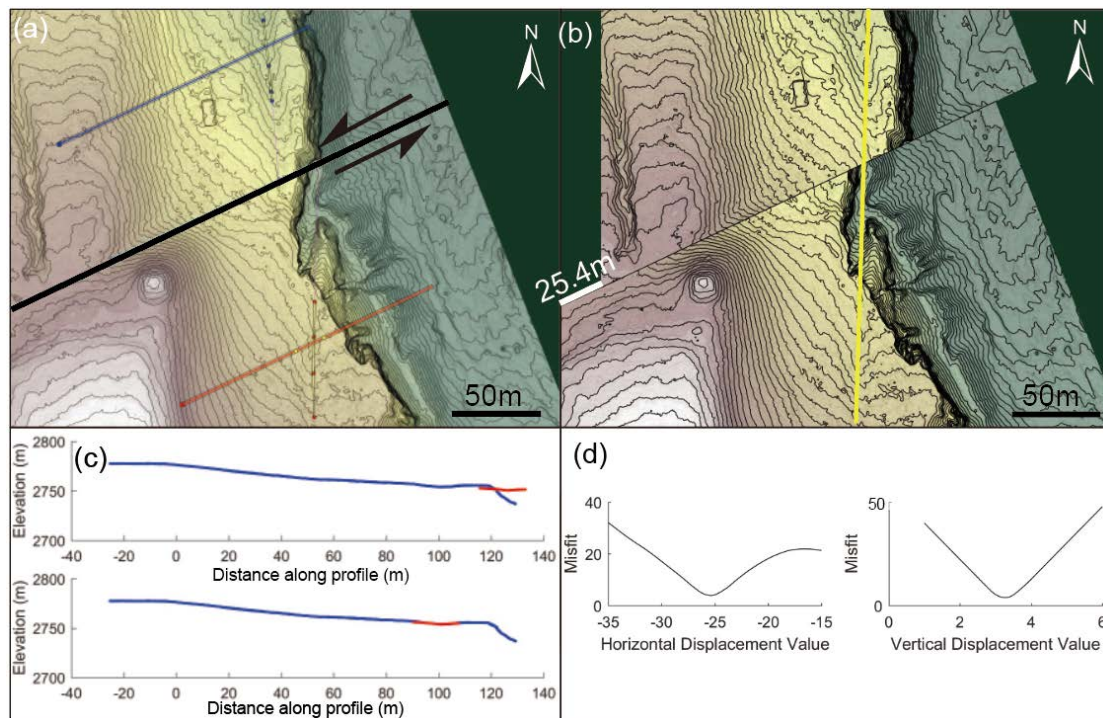

**Figure S1.** Application of the LaDiCaoz\_v2 code for measuring offset T2 at the Jiaerwuzongcun site.

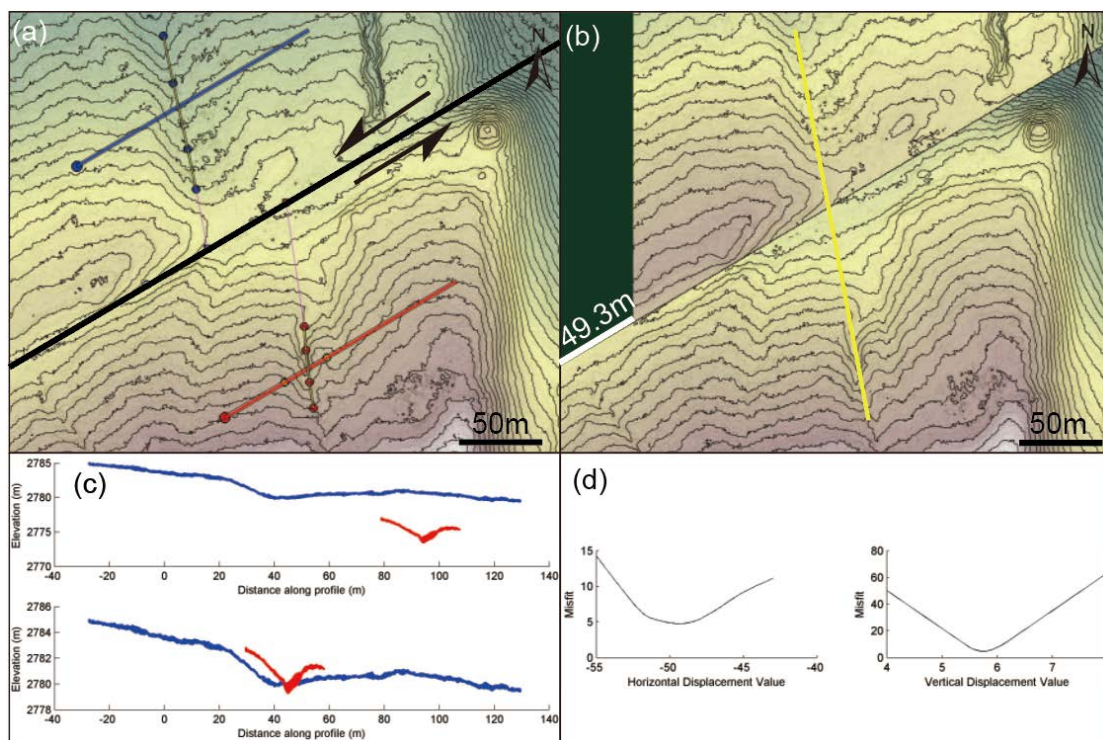

**Figure S2.** Application of the LaDiCaoz\_v2 code for measuring offset T3' at the Jiaerwuzongcun site.



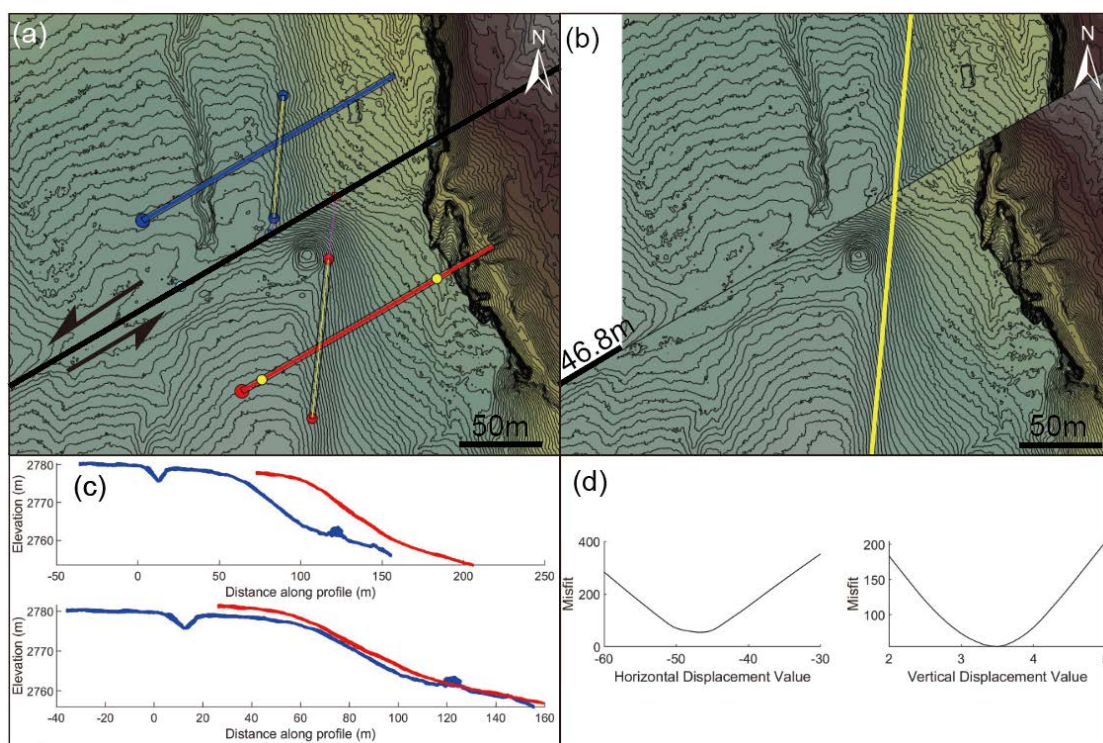

**Figure S3.** Application of the LaDiCaoz\_v2 code for measuring offset T3 at the Jiaerwuzongcun site.

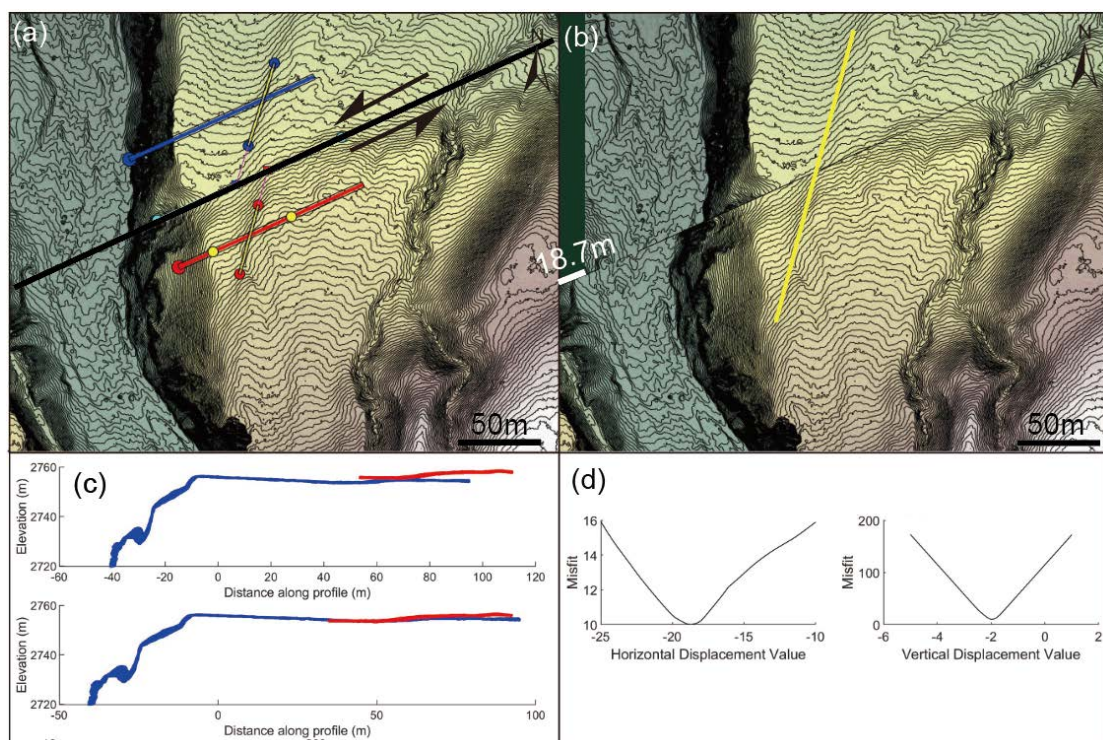

**Figure S4.** Application of the LaDiCaoz\_v2 code for measuring offset T2' at the Jiaerwuzongcun site.

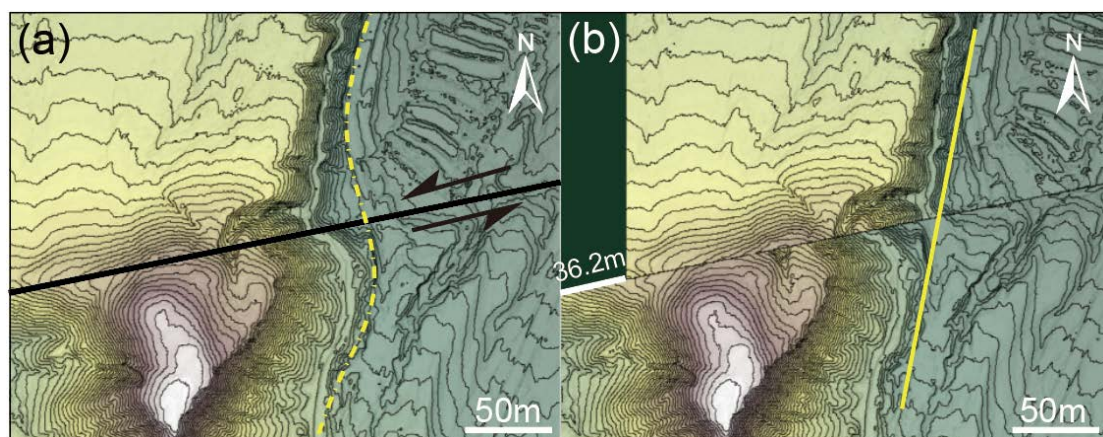

**Figure S5.** Application of the LaDiCaoz\_v2 code for measuring offset offset T4 at the Yandantu site.
